# Supplementary material
Source: MDPI journal article supplement (https://www.mdpi.com/2225-1146/7/2/19)
Supplement: s1 [file s1]

# Covariance Prediction in Large Portfolio Allocation: Supplementary Material\*

Carlos Trucíos<sup>1</sup>, Mauricio Zevallos<sup>2</sup>, Luiz K. Hotta<sup>2</sup> and André A. P. Santos<sup>3</sup>

<sup>1</sup>São Paulo School of Economics, FGV, Brazil

<sup>2</sup>Department of Statistics, University of Campinas, Brazil

<sup>3</sup>UC3M-Santander Big Data Institute

Universidad Carlos III de Madrid

and

Department of Economics

Universidade Federal de Santa Catarina

April 18, 2019

In this supplementary material we discuss the results corresponding to the case without short-selling constraints of the empirical application in the paper of Trucíos et al. (2019). These results are given in Tables 9-16.

[Tables 9 to 16 around here]

The analysis of the tables reveals that no method is the best in all scenarios and the performance depends on the criterion, period and rebalancing strategy. The analysis is first done according to the standard deviation (SD) criterion, because portfolios are chosen in order to have the minimum variance. For portfolios rebalanced daily (Tables 9-12), the largest SD is reported by the SNL-OGARCH

---

\*The first three authors acknowledge financial support from the São Paulo Research Foundation (FAPESP) grants 2016/18599-4, 2018/03012-3, 2013/00506-1 and 2018/04654-9. The fourth author is grateful to the National Council for Scientific and Technological Development (CNPq) for grant 303688/2016-5. The third author is also grateful CNPq for grant 313035/2017-2. The first three authors acknowledge support of the Centre for Applied Research on Econometrics, Finance and Statistics (CAREFS) and the Centre of Quantitative Studies in Economics and Finance (CEQEF).

(full and pre-crisis periods) and RM1994 (crisis and post-crisis periods) procedures, and the best performance is achieved by the DCC with composite likelihood. For portfolios rebalanced monthly (Tables 13-16) the worst performance is obtained by the RM1994 method and the smallest SD is obtained by the DCC procedure with composite likelihood in all cases.

The best performance in terms of the average portfolio return (AV) criterion differs depending on the period and rebalancing strategy. For daily rebalancing, RM1994-LS exhibits the best performance in the pre-crisis, crisis and post-crisis periods, whereas in the full period the best performance is achieved by the RM1994 method. However, for monthly rebalancing, the best performance in the full, pre-crisis and crisis periods is achieved by the RM1994 while the best performance in the post-crisis period is achieved by the RM1994 with linear shrinkage applied to the one-step-ahead conditional covariance matrix.

An interesting finding regarding minimum variance portfolios under no short-selling constraints is described next. Since no limits are imposed on the weights of the portfolio, large turnover values can be obtained, and consequently, the quantity  $(1 - c \times turnover_t)$ , where  $c$  is the basis point, can be large in negative value, changing the sign of the  $(1 + r_{p,t})$  values. As a consequence, there can be large loss (average return) but huge net gain (average net portfolio return taking into account transaction costs). This occurs, for example, in Table 10 (pre-crisis period) using the SNL-OGARCH procedure, where the turnover is 3.951, the average portfolio return is near  $-116$ , but the average portfolio return net of transaction costs is near 621 and 1726 considering 20 bp and 50 bp, respectively. Therefore, the turnover and average net returns in the case without short-selling constraints must be carefully analysed.

Next we focus the analysis only on the full period (Tables 9 and 13) in order to assess the performance of the methods in a period with different volatility levels.

In terms of the best five performances according to each criterion, for daily rebalancing, DCC methods are the best regarding SD and are among the best in terms of information ratio (IR) and Sortino's ratio (SR). RM1994-LS and RM2006-LS are the best according to AV, annualised average portfolio return net of transaction costs considering 20bp and 50bp ( $AV_{20bp}^{net}$  and  $AV_{50bp}^{net}$ , respectively), IR and SR. In

addition, some RPVC methods are among the best in terms of AV. For monthly rebalancing, DCC-LS and LS-DCC-LS are among the best in terms of SD, while RM2006-NLS is the best in terms of SD and is among the best regarding IR and SR. RM1994 and RM1994-LS are the first and second in terms of AV,  $AV_{20bp}^{net}$  and  $AV_{50bp}^{net}$ , but are among the worst in terms of SD.

Now we discuss whether shrinkage improves the performance of the methods in terms of SD. The analysis is again done in the full period (Tables 9 and 13). For daily and monthly rebalancing, shrinkage always improves the performance of CCC, RM2006, RM1994, GPVC, RPVC and OGARCH (except NLS-OGARCH for daily rebalancing and LS-OGARCH-LS for monthly rebalancing). In contrast, shrinkage does not improve the performance of DCC and DECO methods for daily rebalancing. However, shrinkage always improves the performance of DCC for monthly rebalancing (except LS-DCC). In addition, LS-DECO and NLS-DECO improve the performance of the DECO method for monthly rebalancing. This improvement produced by the shrinkage can be important. This occurs, for example, in daily rebalancing applying SNL-CCC, and in monthly rebalancing applying NLS-DCC, DCC-LS, RM2006-NLS, RM1994-LS and RM1994-NLS.

In summary, we can say that in the full period, DCC and Riskmetrics based methods are the best and shrinkage improves the performance of the methods in terms of SD. Additionally, for minimum variance portfolios under no short-selling constraints, the results must be analysed with care.

## References

Trucíos, C., Zevallos, M., Hotta, L. K., and Santos, A. A. P. (2019). Covariance prediction in large portfolio allocation. *Submitted to Econometrics*.

Table 9: Annualised performance measures: AV, SD, IR, SR and TO stand for the average, standard deviation, information ratio, Sortino's ratio and turnover of the out-of-sample MVP returns.  $AV_{20bp}^{net}$  and  $AV_{50bp}^{net}$  stand for the average out-of-sample MVP return net of transaction costs considering 20 and 50 basis-points, respectively. Period January 2004 - November 2017. The shaded cells denote the top five for each criterion. Weights are rebalanced on a daily basis considering no short-selling constraints

|                | AV      | SD           | IR     | SR     | TO    | $AV_{20bp}^{net}$ | $AV_{50bp}^{net}$ |
|----------------|---------|--------------|--------|--------|-------|-------------------|-------------------|
| 1/N            | 8.302   | 20.058 (44)  | 0.414  | 0.570  | -     | -                 | -                 |
| CCC            | 8.052   | 11.033 (21)  | 0.730  | 1.017  | 0.838 | 7.575             | 6.924             |
| CCC LS         | 6.546   | 10.899 (18)  | 0.601  | 0.838  | 0.631 | 6.194             | 5.704             |
| CCC NLS        | 7.939   | 10.844 (15)  | 0.732  | 1.023  | 0.666 | 7.554             | 7.033             |
| LS CCC         | 7.940   | 10.853 (17)  | 0.732  | 1.019  | 0.758 | 7.506             | 6.917             |
| NLS CCC        | 7.852   | 10.686 (12)  | 0.735  | 1.023  | 0.649 | 7.474             | 6.969             |
| LS CCC LS      | 6.242   | 10.916 (19)  | 0.572  | 0.796  | 0.579 | 5.916             | 5.466             |
| NLS CCC NLS    | 7.939   | 10.844 (15)  | 0.732  | 1.023  | 0.666 | 7.554             | 7.033             |
| DCC            | 8.942   | 9.264 (1)    | 0.965  | 1.357  | 0.859 | 8.454             | 7.784             |
| DCC LS         | 7.479   | 9.632 (4)    | 0.777  | 1.093  | 0.685 | 7.099             | 6.567             |
| DCC NLS        | 9.192   | 9.658 (6)    | 0.952  | 1.327  | 0.645 | 8.806             | 8.302             |
| LS DCC         | 8.950   | 9.279 (2)    | 0.965  | 1.356  | 0.862 | 8.460             | 7.787             |
| NLS DCC        | 9.083   | 9.300 (3)    | 0.977  | 1.377  | 0.872 | 8.592             | 7.911             |
| LS DCC LS      | 7.493   | 9.640 (5)    | 0.777  | 1.094  | 0.686 | 7.111             | 6.578             |
| NLS DCC NLS    | 9.247   | 9.677 (7)    | 0.956  | 1.334  | 0.649 | 8.862             | 8.355             |
| RM2006         | 8.456   | 11.923 (26)  | 0.709  | 0.976  | 0.546 | 8.141             | 7.720             |
| RM2006 LS      | 12.098  | 10.772 (13)  | 1.123  | 1.582  | 0.565 | 11.771            | 11.327            |
| RM2006 NLS     | 9.445   | 10.013 (8)   | 0.943  | 1.297  | 0.330 | 9.228             | 8.970             |
| RM1994         | 7.364   | 26.518 (46)  | 0.278  | 0.382  | 2.933 | 5.727             | 3.444             |
| RM1994 LS      | 12.213  | 11.390 (24)  | 1.072  | 1.527  | 0.590 | 11.869            | 11.403            |
| RM1994 NLS     | 9.773   | 10.452 (9)   | 0.935  | 1.292  | 0.361 | 9.526             | 9.243             |
| DECO           | 6.312   | 12.132 (27)  | 0.520  | 0.730  | 0.368 | 6.096             | 5.810             |
| DECO NLS       | 6.150   | 12.385 (34)  | 0.497  | 0.700  | 0.436 | 5.899             | 5.558             |
| LS DECO        | 6.463   | 12.141 (28)  | 0.532  | 0.748  | 0.368 | 6.248             | 5.961             |
| NLS DECO       | 6.462   | 12.141 (29)  | 0.532  | 0.748  | 0.368 | 6.247             | 5.960             |
| NLS DECO NLS   | 6.210   | 12.401 (35)  | 0.501  | 0.707  | 0.437 | 5.963             | 5.621             |
| OGARCH         | -1.751  | 26.101 (45)  | -0.067 | -0.071 | 1.971 | 3.377             | 11.124            |
| OGARCH LS      | 7.545   | 11.135 (22)  | 0.678  | 0.954  | 0.322 | 7.372             | 7.121             |
| OGARCH NLS     | 8.834   | 10.574 (11)  | 0.835  | 1.167  | 0.373 | 8.610             | 8.321             |
| LS OGARCH      | 8.799   | 17.372 (43)  | 0.507  | 0.666  | 1.519 | 10.426            | 12.923            |
| NLS OGARCH     | -32.209 | 116.156 (47) | -0.277 | -0.278 | 3.951 | 181.760           | 502.767           |
| LS OGARCH LS   | 8.250   | 11.174 (23)  | 0.738  | 1.038  | 0.305 | 8.082             | 7.842             |
| NLS OGARCH NLS | 8.826   | 10.573 (10)  | 0.835  | 1.166  | 0.372 | 8.603             | 8.314             |
| GPVC           | 8.573   | 12.993 (38)  | 0.660  | 0.931  | 0.971 | 7.996             | 7.218             |
| GPVC LS        | 8.398   | 10.799 (14)  | 0.778  | 1.083  | 0.290 | 8.210             | 7.985             |
| GPVC NLS       | 7.634   | 12.173 (30)  | 0.627  | 0.877  | 0.560 | 7.289             | 6.859             |
| LS GPVC        | 9.764   | 12.323 (32)  | 0.792  | 1.121  | 0.712 | 9.320             | 8.749             |
| NLS GPVC       | 7.872   | 12.586 (36)  | 0.626  | 0.875  | 0.818 | 7.382             | 6.736             |
| LS GPVC LS     | 9.257   | 10.997 (20)  | 0.842  | 1.176  | 0.242 | 9.092             | 8.905             |
| NLS GPVC NLS   | 7.478   | 12.331 (33)  | 0.606  | 0.848  | 0.556 | 7.134             | 6.707             |
| RPVC           | 8.183   | 15.938 (42)  | 0.513  | 0.704  | 2.243 | 7.189             | 5.805             |
| RPCV LS        | 7.499   | 11.453 (25)  | 0.655  | 0.917  | 0.572 | 7.165             | 6.712             |
| RPVC NLS       | 9.905   | 13.300 (39)  | 0.745  | 1.063  | 1.043 | 9.279             | 8.444             |
| LS RPVC        | 8.595   | 13.774 (40)  | 0.624  | 0.902  | 1.366 | 7.797             | 6.682             |
| NLS RPVC       | 10.533  | 14.281 (41)  | 0.738  | 1.076  | 1.771 | 9.394             | 7.750             |
| LS RPCV LS     | 6.519   | 12.201 (31)  | 0.534  | 0.754  | 0.489 | 6.240             | 5.852             |
| NLS RPVC NLS   | 10.317  | 12.606 (37)  | 0.818  | 1.182  | 0.968 | 9.765             | 9.000             |

Table 10: Annualised performance measures: AV, SD, IR, SR and TO stand for the average, standard deviation, information ratio, Sortino's ratio and turnover of the out-of-sample MVP returns.  $AV_{20bp}^{net}$  and  $AV_{50bp}^{net}$  stand for the average out-of-sample MVP return net of transaction costs considering 20 and 50 basis-points, respectively. Period January 2004 - December 2007. The shaded cells denote the top five for each criterion. Weights are rebalanced on a daily basis considering no short-selling constraints

|                | AV       | SD           | IR     | SR     | TO     | $AV_{20bp}^{net}$ | $AV_{50bp}^{net}$ |
|----------------|----------|--------------|--------|--------|--------|-------------------|-------------------|
| 1/N            | 12.732   | 12.755 (42)  | 0.998  | 1.418  | -      | -                 |                   |
| CCC            | 8.069    | 8.066 (16)   | 1.000  | 1.416  | 0.698  | 7.562             | 7.023             |
| CCC LS         | 5.542    | 7.888 (13)   | 0.703  | 0.985  | 0.527  | 5.183             | 4.777             |
| CCC NLS        | 7.567    | 7.809 (11)   | 0.969  | 1.371  | 0.581  | 7.133             | 6.684             |
| LS CCC         | 7.706    | 7.906 (14)   | 0.975  | 1.377  | 0.639  | 7.238             | 6.745             |
| NLS CCC        | 7.675    | 7.736 (10)   | 0.992  | 1.402  | 0.535  | 7.260             | 6.847             |
| LS CCC LS      | 4.464    | 8.130 (17)   | 0.549  | 0.763  | 0.483  | 4.128             | 3.757             |
| NLS CCC NLS    | 7.567    | 7.809 (11)   | 0.969  | 1.371  | 0.581  | 7.133             | 6.684             |
| DCC            | 8.249    | 6.833 (1)    | 1.207  | 1.716  | 0.708  | 7.738             | 7.189             |
| DCC LS         | 5.738    | 7.258 (6)    | 0.791  | 1.109  | 0.537  | 5.373             | 4.959             |
| DCC NLS        | 8.319    | 6.934 (4)    | 1.200  | 1.702  | 0.608  | 7.831             | 7.359             |
| LS DCC         | 8.297    | 6.846 (2)    | 1.212  | 1.724  | 0.711  | 7.785             | 7.234             |
| NLS DCC        | 8.737    | 6.894 (3)    | 1.267  | 1.815  | 0.732  | 8.232             | 7.663             |
| LS DCC LS      | 5.752    | 7.262 (7)    | 0.792  | 1.111  | 0.538  | 5.386             | 4.972             |
| NLS DCC NLS    | 8.553    | 6.967 (5)    | 1.228  | 1.751  | 0.625  | 8.068             | 7.582             |
| RM2006         | 11.477   | 8.578 (24)   | 1.338  | 1.904  | 0.411  | 11.139            | 10.813            |
| RM2006 LS      | 9.038    | 7.725 (9)    | 1.170  | 1.684  | 0.439  | 8.702             | 8.361             |
| RM2006 NLS     | 9.335    | 7.482 (8)    | 1.248  | 1.748  | 0.280  | 9.031             | 8.810             |
| RM1994         | 15.516   | 18.682 (45)  | 0.831  | 1.230  | 2.305  | 13.811            | 11.852            |
| RM1994 LS      | 9.073    | 8.393 (22)   | 1.081  | 1.570  | 0.483  | 8.703             | 8.324             |
| RM1994 NLS     | 8.887    | 8.030 (15)   | 1.107  | 1.554  | 0.332  | 8.510             | 8.249             |
| DECO           | 3.499    | 9.350 (27)   | 0.374  | 0.527  | 0.354  | 3.232             | 2.960             |
| DECO NLS       | 3.138    | 9.479 (32)   | 0.331  | 0.467  | 0.424  | 2.838             | 2.512             |
| LS DECO        | 3.756    | 9.437 (29)   | 0.398  | 0.563  | 0.354  | 3.494             | 3.221             |
| NLS DECO       | 3.756    | 9.438 (30)   | 0.398  | 0.563  | 0.354  | 3.494             | 3.221             |
| NLS DECO NLS   | 3.315    | 9.569 (33)   | 0.346  | 0.491  | 0.427  | 3.027             | 2.698             |
| OGARCH         | -9.878   | 40.590 (46)  | -0.243 | -0.249 | 3.690  | 0.870             | 17.183            |
| OGARCH LS      | 9.036    | 9.177 (26)   | 0.985  | 1.369  | 0.224  | 8.898             | 8.723             |
| OGARCH NLS     | 10.538   | 8.310 (19)   | 1.268  | 1.809  | 0.328  | 10.258            | 9.998             |
| LS OGARCH      | 14.665   | 13.437 (44)  | 1.091  | 2.155  | 0.925  | 12.351            | 9.083             |
| NLS OGARCH     | -115.725 | 214.848 (47) | -0.539 | -0.539 | 10.570 | 620.764           | 1725.689          |
| LS OGARCH LS   | 9.733    | 9.470 (31)   | 1.028  | 1.440  | 0.205  | 9.598             | 9.435             |
| NLS OGARCH NLS | 10.490   | 8.307 (18)   | 1.263  | 1.801  | 0.326  | 10.211            | 9.953             |
| GPVC           | 9.169    | 10.284 (39)  | 0.892  | 1.300  | 0.710  | 8.594             | 8.038             |
| GPVC LS        | 9.234    | 8.421 (23)   | 1.097  | 1.550  | 0.186  | 9.007             | 8.862             |
| GPVC NLS       | 8.647    | 9.681 (34)   | 0.893  | 1.284  | 0.412  | 8.230             | 7.908             |
| LS GPVC        | 10.544   | 9.409 (28)   | 1.121  | 1.614  | 0.505  | 10.055            | 9.654             |
| NLS GPVC       | 7.160    | 9.930 (37)   | 0.721  | 1.033  | 0.631  | 6.633             | 6.156             |
| LS GPVC LS     | 9.859    | 8.370 (21)   | 1.178  | 1.677  | 0.168  | 9.628             | 9.497             |
| NLS GPVC NLS   | 8.475    | 9.794 (36)   | 0.865  | 1.247  | 0.401  | 8.060             | 7.747             |
| RPVC           | 6.495    | 13.255 (43)  | 0.490  | 0.671  | 2.567  | 4.998             | 3.121             |
| RPCV LS        | 7.862    | 8.322 (20)   | 0.945  | 1.334  | 0.419  | 7.527             | 7.194             |
| RPVC NLS       | 9.168    | 10.129 (38)  | 0.905  | 1.298  | 1.066  | 8.376             | 7.543             |
| LS RPVC        | 8.201    | 10.627 (40)  | 0.772  | 1.130  | 1.451  | 7.239             | 6.079             |
| NLS RPVC       | 9.091    | 12.002 (41)  | 0.758  | 1.162  | 2.093  | 7.397             | 5.080             |
| LS RPCV LS     | 5.947    | 8.845 (25)   | 0.672  | 0.928  | 0.383  | 5.679             | 5.378             |
| NLS RPVC NLS   | 8.018    | 9.751 (35)   | 0.822  | 1.181  | 0.973  | 7.364             | 6.604             |

Table 11: Annualised performance measures: AV, SD, IR, SR and TO stand for the average, standard deviation, information ratio, Sortino's ratio and turnover of the out-of-sample MVP returns.  $AV_{20bp}^{net}$  and  $AV_{50bp}^{net}$  stand for the average out-of-sample MVP return net of transaction costs considering 20 and 50 basis-points, respectively. Period January 2008 - June 2009. The shaded cells denote the top five for each criterion. Weights are rebalanced on a daily basis considering no short-selling constraints

|                | AV      | SD          | IR     | SR     | TO    | $AV_{20bp}^{net}$ | $AV_{50bp}^{net}$ |
|----------------|---------|-------------|--------|--------|-------|-------------------|-------------------|
| 1/N            | -30.668 | 43.046 (46) | -0.713 | -0.960 | -     | -                 |                   |
| CCC            | -20.400 | 18.640 (22) | -1.094 | -1.415 | 0.626 | -20.692           | -21.130           |
| CCC LS         | -20.078 | 18.605 (21) | -1.079 | -1.395 | 0.609 | -20.363           | -20.789           |
| CCC NLS        | -18.955 | 19.082 (25) | -0.993 | -1.292 | 0.430 | -19.163           | -19.475           |
| LS CCC         | -20.230 | 18.470 (18) | -1.095 | -1.413 | 0.585 | -20.503           | -20.913           |
| NLS CCC        | -19.128 | 18.475 (19) | -1.035 | -1.336 | 0.516 | -19.371           | -19.734           |
| LS CCC LS      | -19.795 | 18.460 (17) | -1.072 | -1.384 | 0.572 | -20.063           | -20.464           |
| NLS CCC NLS    | -18.955 | 19.082 (25) | -0.993 | -1.292 | 0.430 | -19.163           | -19.475           |
| DCC            | -15.158 | 15.823 (1)  | -0.958 | -1.236 | 0.704 | -15.484           | -15.972           |
| DCC LS         | -15.414 | 15.935 (4)  | -0.967 | -1.246 | 0.684 | -15.731           | -16.206           |
| DCC NLS        | -15.999 | 17.389 (6)  | -0.920 | -1.186 | 0.465 | -16.217           | -16.543           |
| LS DCC         | -15.042 | 15.863 (2)  | -0.948 | -1.224 | 0.709 | -15.370           | -15.863           |
| NLS DCC        | -14.016 | 15.877 (3)  | -0.883 | -1.148 | 0.715 | -14.351           | -14.852           |
| LS DCC LS      | -15.304 | 15.975 (5)  | -0.958 | -1.234 | 0.689 | -15.623           | -16.102           |
| NLS DCC NLS    | -15.692 | 17.417 (7)  | -0.901 | -1.165 | 0.467 | -15.912           | -16.243           |
| RM2006         | -23.481 | 20.689 (40) | -1.135 | -1.432 | 0.594 | -23.726           | -24.094           |
| RM2006 LS      | -6.744  | 19.072 (24) | -0.354 | -0.459 | 0.567 | -7.020            | -7.433            |
| RM2006 NLS     | -15.222 | 17.827 (14) | -0.854 | -1.090 | 0.302 | -15.355           | -15.555           |
| RM1994         | -50.810 | 44.772 (47) | -1.135 | -1.430 | 2.718 | -51.440           | -52.387           |
| RM1994 LS      | -3.433  | 20.355 (38) | -0.169 | -0.227 | 0.648 | -3.757            | -4.244            |
| RM1994 NLS     | -13.731 | 18.562 (20) | -0.740 | -0.959 | 0.340 | -13.882           | -14.109           |
| DECO           | -16.632 | 19.927 (32) | -0.835 | -1.092 | 0.382 | -16.809           | -17.076           |
| DECO NLS       | -15.162 | 20.246 (35) | -0.749 | -0.999 | 0.360 | -15.333           | -15.590           |
| LS DECO        | -16.049 | 19.878 (29) | -0.807 | -1.059 | 0.376 | -16.224           | -16.487           |
| NLS DECO       | -16.053 | 19.880 (30) | -0.808 | -1.059 | 0.376 | -16.228           | -16.491           |
| NLS DECO NLS   | -14.939 | 20.221 (34) | -0.739 | -0.988 | 0.357 | -15.108           | -15.362           |
| OGARCH         | -11.771 | 20.285 (36) | -0.580 | -0.785 | 0.670 | -12.074           | -12.530           |
| OGARCH LS      | -8.367  | 19.246 (27) | -0.435 | -0.589 | 0.572 | -8.638            | -9.044            |
| OGARCH NLS     | -12.362 | 17.519 (12) | -0.706 | -0.911 | 0.392 | -12.538           | -12.801           |
| LS OGARCH      | 10.914  | 27.407 (45) | 0.398  | 0.759  | 3.161 | -5.631            | -30.447           |
| NLS OGARCH     | -11.771 | 20.285 (37) | -0.580 | -0.785 | 0.670 | -12.075           | -12.530           |
| LS OGARCH LS   | -4.829  | 19.032 (23) | -0.254 | -0.341 | 0.575 | -5.101            | -5.510            |
| NLS OGARCH NLS | -12.362 | 17.519 (11) | -0.706 | -0.911 | 0.392 | -12.537           | -12.800           |
| GPVC           | -13.708 | 17.897 (15) | -0.766 | -0.999 | 0.174 | -13.773           | -13.871           |
| GPVC LS        | -10.723 | 17.680 (13) | -0.607 | -0.777 | 0.188 | -10.797           | -10.909           |
| GPVC NLS       | -14.336 | 17.466 (8)  | -0.821 | -1.053 | 0.142 | -14.393           | -14.479           |
| LS GPVC        | -8.419  | 17.959 (16) | -0.469 | -0.618 | 0.155 | -8.484            | -8.581            |
| NLS GPVC       | -12.460 | 17.484 (9)  | -0.713 | -0.915 | 0.150 | -12.519           | -12.608           |
| LS GPVC LS     | -4.383  | 19.411 (28) | -0.226 | -0.294 | 0.154 | -4.442            | -4.531            |
| NLS GPVC NLS   | -14.441 | 17.494 (10) | -0.826 | -1.059 | 0.142 | -14.498           | -14.583           |
| RPVC           | -12.858 | 21.823 (42) | -0.589 | -0.800 | 0.699 | -13.188           | -13.681           |
| RPCV LS        | -11.876 | 19.917 (31) | -0.596 | -0.792 | 0.515 | -12.118           | -12.481           |
| RPVC NLS       | -17.311 | 19.989 (33) | -0.866 | -1.163 | 0.373 | -17.478           | -17.729           |
| LS RPVC        | -21.358 | 23.955 (44) | -0.892 | -1.231 | 0.783 | -21.767           | -22.380           |
| NLS RPVC       | -13.316 | 20.778 (41) | -0.641 | -0.890 | 0.484 | -13.564           | -13.936           |
| LS RPCV LS     | -18.578 | 23.219 (43) | -0.800 | -1.098 | 0.598 | -18.899           | -19.382           |
| NLS RPVC NLS   | -15.170 | 20.458 (39) | -0.742 | -1.028 | 0.384 | -15.355           | -15.631           |

Table 12: Annualised performance measures: AV, SD, IR, SR and TO stand for the average, standard deviation, information ratio, Sortino's ratio and turnover of the out-of-sample MVP returns.  $AV_{20bp}^{net}$  and  $AV_{50bp}^{net}$  stand for the average out-of-sample MVP return net of transaction costs considering 20 and 50 basis-points, respectively. Period July 2009 - November 2017. The shaded cells denote the top five for each criterion. Weights are rebalanced on a daily basis considering no short-selling constraints

|                | AV     | SD          | IR    | SR    | TO    | $AV_{20bp}^{net}$ | $AV_{50bp}^{net}$ |
|----------------|--------|-------------|-------|-------|-------|-------------------|-------------------|
| 1/N            | 13.130 | 16.057 (43) | 0.818 | 1.148 | -     | -                 | -                 |
| CCC            | 13.108 | 10.393 (24) | 1.261 | 1.832 | 0.942 | 12.613            | 11.870            |
| CCC LS         | 11.763 | 10.238 (22) | 1.149 | 1.681 | 0.684 | 11.402            | 10.861            |
| CCC NLS        | 12.904 | 10.011 (17) | 1.289 | 1.887 | 0.748 | 12.510            | 11.918            |
| LS CCC         | 13.065 | 10.192 (20) | 1.282 | 1.868 | 0.846 | 12.620            | 11.952            |
| NLS CCC        | 12.738 | 9.961 (14)  | 1.279 | 1.866 | 0.728 | 12.355            | 11.780            |
| LS CCC LS      | 11.722 | 10.225 (21) | 1.146 | 1.677 | 0.627 | 11.391            | 10.895            |
| NLS CCC NLS    | 12.904 | 10.011 (17) | 1.289 | 1.887 | 0.748 | 12.510            | 11.918            |
| DCC            | 13.561 | 8.649 (1)   | 1.568 | 2.326 | 0.958 | 13.055            | 12.295            |
| DCC LS         | 12.383 | 9.102 (8)   | 1.361 | 2.025 | 0.755 | 11.984            | 11.386            |
| DCC NLS        | 14.092 | 8.785 (4)   | 1.604 | 2.360 | 0.694 | 13.724            | 13.173            |
| LS DCC         | 13.531 | 8.657 (2)   | 1.563 | 2.318 | 0.961 | 13.023            | 12.260            |
| NLS DCC        | 13.359 | 8.674 (3)   | 1.540 | 2.278 | 0.967 | 12.848            | 12.081            |
| LS DCC LS      | 12.379 | 9.101 (7)   | 1.360 | 2.024 | 0.757 | 11.979            | 11.379            |
| NLS DCC NLS    | 14.017 | 8.798 (5)   | 1.593 | 2.341 | 0.692 | 13.651            | 13.101            |
| RM2006         | 12.703 | 11.106 (27) | 1.144 | 1.655 | 0.602 | 12.386            | 11.912            |
| RM2006 LS      | 16.909 | 9.930 (12)  | 1.703 | 2.530 | 0.624 | 16.576            | 16.078            |
| RM2006 NLS     | 13.887 | 9.071 (6)   | 1.531 | 2.210 | 0.359 | 13.697            | 13.411            |
| RM1994         | 13.838 | 25.270 (47) | 0.548 | 0.781 | 3.270 | 12.055            | 9.381             |
| RM1994 LS      | 16.492 | 10.356 (23) | 1.593 | 2.351 | 0.630 | 16.156            | 15.653            |
| RM1994 NLS     | 14.378 | 9.401 (9)   | 1.529 | 2.202 | 0.379 | 14.176            | 13.872            |
| DECO           | 11.735 | 11.440 (30) | 1.026 | 1.497 | 0.372 | 11.537            | 11.239            |
| DECO NLS       | 11.376 | 11.736 (31) | 0.969 | 1.410 | 0.455 | 11.135            | 10.773            |
| LS DECO        | 11.758 | 11.437 (28) | 1.028 | 1.500 | 0.373 | 11.559            | 11.260            |
| NLS DECO       | 11.757 | 11.437 (28) | 1.028 | 1.500 | 0.373 | 11.558            | 11.260            |
| NLS DECO NLS   | 11.353 | 11.739 (32) | 0.967 | 1.407 | 0.457 | 11.110            | 10.747            |
| OGARCH         | 3.901  | 16.429 (44) | 0.238 | 0.264 | 1.384 | 7.321             | 12.450            |
| OGARCH LS      | 9.668  | 9.952 (13)  | 0.972 | 1.412 | 0.325 | 9.495             | 9.235             |
| OGARCH NLS     | 11.796 | 9.861 (10)  | 1.196 | 1.741 | 0.390 | 11.590            | 11.282            |
| LS OGARCH      | 5.632  | 16.728 (46) | 0.337 | 0.371 | 1.509 | 12.367            | 22.471            |
| NLS OGARCH     | 3.901  | 16.450 (45) | 0.237 | 0.263 | 1.385 | 7.331             | 12.475            |
| LS OGARCH LS   | 9.872  | 9.970 (15)  | 0.990 | 1.441 | 0.305 | 9.708             | 9.461             |
| NLS OGARCH NLS | 11.806 | 9.862 (11)  | 1.197 | 1.742 | 0.390 | 11.600            | 11.292            |
| GPVC           | 12.255 | 13.101 (39) | 0.935 | 1.345 | 1.236 | 11.586            | 10.582            |
| GPVC LS        | 11.403 | 10.166 (19) | 1.122 | 1.636 | 0.358 | 11.214            | 10.931            |
| GPVC NLS       | 11.062 | 12.082 (34) | 0.916 | 1.316 | 0.704 | 10.701            | 10.158            |
| LS GPVC        | 12.629 | 12.311 (36) | 1.026 | 1.486 | 0.909 | 12.139            | 11.404            |
| NLS GPVC       | 11.830 | 12.669 (38) | 0.934 | 1.339 | 1.026 | 11.280            | 10.456            |
| LS GPVC LS     | 11.399 | 9.983 (16)  | 1.142 | 1.674 | 0.292 | 11.245            | 11.015            |
| NLS GPVC NLS   | 10.905 | 12.294 (35) | 0.887 | 1.271 | 0.703 | 10.544            | 10.003            |
| RPVC           | 12.731 | 15.864 (42) | 0.803 | 1.103 | 2.364 | 11.859            | 10.551            |
| RPCV LS        | 10.775 | 10.643 (26) | 1.012 | 1.466 | 0.654 | 10.425            | 9.900             |
| RPVC NLS       | 15.099 | 13.122 (40) | 1.151 | 1.683 | 1.151 | 14.472            | 13.532            |
| LS RPVC        | 14.113 | 12.547 (37) | 1.125 | 1.667 | 1.428 | 13.325            | 12.142            |
| NLS RPVC       | 15.465 | 13.844 (41) | 1.117 | 1.634 | 1.847 | 14.431            | 12.880            |
| LS RPCV LS     | 11.258 | 10.619 (25) | 1.060 | 1.545 | 0.520 | 10.982            | 10.569            |
| NLS RPVC NLS   | 15.948 | 11.946 (33) | 1.335 | 1.972 | 1.069 | 15.378            | 14.524            |

Table 13: Annualised performance measures: AV, SD, IR, SR and TO stand for the average, standard deviation, information ratio, Sortino's ratio and turnover of the out-of-sample MVP returns.  $AV_{20bp}^{net}$  and  $AV_{50bp}^{net}$  stand for the average out-of-sample MVP return net of transaction costs considering 20 and 50 basis-points, respectively. Period January 2004 - November 2017. The shaded cells denote the top five for each criterion. Weights are rebalanced on a monthly basis considering no short-selling constraints

|                | AV     | SD          | IR    | SR    | TO    | $AV_{20bp}^{net}$ | $AV_{50bp}^{net}$ |
|----------------|--------|-------------|-------|-------|-------|-------------------|-------------------|
| 1/N            | 8.302  | 20.058 (46) | 0.414 | 0.570 | -     | -                 | -                 |
| CCC            | 7.729  | 11.407 (24) | 0.678 | 0.951 | 0.881 | 7.704             | 7.668             |
| CCC LS         | 6.248  | 11.146 (9)  | 0.561 | 0.788 | 0.671 | 6.230             | 6.203             |
| CCC NLS        | 7.605  | 11.274 (18) | 0.675 | 0.946 | 0.701 | 7.586             | 7.557             |
| LS CCC         | 7.733  | 11.252 (16) | 0.687 | 0.964 | 0.799 | 7.712             | 7.679             |
| NLS CCC        | 7.588  | 11.106 (7)  | 0.683 | 0.957 | 0.686 | 7.569             | 7.541             |
| LS CCC LS      | 6.025  | 11.176 (10) | 0.539 | 0.757 | 0.619 | 6.008             | 5.984             |
| NLS CCC NLS    | 7.605  | 11.274 (18) | 0.675 | 0.946 | 0.701 | 7.586             | 7.557             |
| DCC            | 8.257  | 11.250 (15) | 0.734 | 1.031 | 0.910 | 8.232             | 8.195             |
| DCC LS         | 6.848  | 11.024 (2)  | 0.621 | 0.871 | 0.728 | 6.828             | 6.799             |
| DCC NLS        | 8.440  | 11.131 (8)  | 0.758 | 1.063 | 0.673 | 8.422             | 8.394             |
| LS DCC         | 8.265  | 11.255 (17) | 0.734 | 1.031 | 0.912 | 8.240             | 8.202             |
| NLS DCC        | 8.318  | 11.194 (12) | 0.743 | 1.047 | 0.921 | 8.293             | 8.255             |
| LS DCC LS      | 6.867  | 11.025 (3)  | 0.623 | 0.874 | 0.730 | 6.848             | 6.818             |
| NLS DCC NLS    | 8.461  | 11.093 (6)  | 0.763 | 1.071 | 0.675 | 8.443             | 8.415             |
| RM2006         | 9.381  | 12.396 (29) | 0.757 | 1.057 | 0.606 | 9.366             | 9.344             |
| RM2006 LS      | 10.542 | 11.219 (13) | 0.940 | 1.328 | 0.598 | 10.527            | 10.504            |
| RM2006 NLS     | 9.359  | 10.715 (1)  | 0.874 | 1.229 | 0.357 | 9.350             | 9.335             |
| RM1994         | 13.708 | 27.177 (47) | 0.504 | 0.705 | 3.014 | 13.647            | 13.555            |
| RM1994 LS      | 10.822 | 11.643 (27) | 0.930 | 1.312 | 0.627 | 10.805            | 10.780            |
| RM1994 NLS     | 10.289 | 11.178 (11) | 0.920 | 1.301 | 0.373 | 10.278            | 10.263            |
| DECO           | 5.270  | 12.607 (33) | 0.418 | 0.585 | 0.388 | 5.260             | 5.245             |
| DECO NLS       | 5.013  | 12.908 (35) | 0.388 | 0.546 | 0.461 | 5.001             | 4.984             |
| LS DECO        | 5.480  | 12.606 (31) | 0.435 | 0.610 | 0.388 | 5.470             | 5.455             |
| NLS DECO       | 5.479  | 12.606 (32) | 0.435 | 0.610 | 0.388 | 5.469             | 5.454             |
| NLS DECO NLS   | 5.123  | 12.912 (36) | 0.397 | 0.559 | 0.461 | 5.111             | 5.094             |
| OGARCH         | 9.695  | 11.380 (22) | 0.852 | 1.204 | 0.405 | 9.684             | 9.668             |
| OGARCH LS      | 8.272  | 11.341 (20) | 0.729 | 1.028 | 0.340 | 8.263             | 8.250             |
| OGARCH NLS     | 9.085  | 11.056 (5)  | 0.822 | 1.154 | 0.382 | 9.075             | 9.061             |
| LS OGARCH      | 9.780  | 11.236 (14) | 0.870 | 1.230 | 0.405 | 9.769             | 9.753             |
| NLS OGARCH     | 9.698  | 11.380 (21) | 0.852 | 1.204 | 0.405 | 9.688             | 9.672             |
| LS OGARCH LS   | 8.506  | 11.438 (25) | 0.744 | 1.047 | 0.317 | 8.498             | 8.486             |
| NLS OGARCH NLS | 9.091  | 11.055 (4)  | 0.822 | 1.155 | 0.382 | 9.082             | 9.067             |
| GPVC           | 9.390  | 14.185 (42) | 0.662 | 0.936 | 1.143 | 9.350             | 9.289             |
| GPVC LS        | 8.907  | 11.389 (23) | 0.782 | 1.101 | 0.306 | 8.899             | 8.887             |
| GPVC NLS       | 8.204  | 12.901 (34) | 0.636 | 0.891 | 0.600 | 8.189             | 8.166             |
| LS GPVC        | 9.730  | 13.074 (38) | 0.744 | 1.053 | 0.875 | 9.704             | 9.663             |
| NLS GPVC       | 9.003  | 13.674 (40) | 0.658 | 0.930 | 0.891 | 8.975             | 8.934             |
| LS GPVC LS     | 9.120  | 11.480 (26) | 0.794 | 1.117 | 0.254 | 9.114             | 9.104             |
| NLS GPVC NLS   | 8.351  | 13.050 (37) | 0.640 | 0.898 | 0.602 | 8.335             | 8.311             |
| RPVC           | 6.701  | 17.016 (45) | 0.394 | 0.548 | 2.343 | 6.629             | 6.521             |
| RPCV LS        | 6.113  | 12.126 (28) | 0.504 | 0.687 | 0.619 | 6.098             | 6.075             |
| RPVC NLS       | 6.720  | 13.824 (41) | 0.486 | 0.671 | 1.141 | 6.691             | 6.648             |
| LS RPVC        | 6.025  | 14.267 (43) | 0.422 | 0.584 | 1.590 | 5.974             | 5.899             |
| NLS RPVC       | 8.390  | 15.095 (44) | 0.556 | 0.778 | 2.077 | 8.359             | 8.314             |
| LS RPCV LS     | 5.365  | 12.557 (30) | 0.427 | 0.596 | 0.585 | 5.348             | 5.321             |
| NLS RPVC NLS   | 8.782  | 13.116 (39) | 0.670 | 0.945 | 0.969 | 8.757             | 8.719             |



Table 14: Annualised performance measures: AV, SD, IR, SR and TO stand for the average, standard deviation, information ratio, Sortino's ratio and turnover of the out-of-sample MVP returns.  $AV_{20bp}^{net}$  and  $AV_{50bp}^{net}$  stand for the average out-of-sample MVP return net of transaction costs considering 20 and 50 basis-points, respectively. Period January 2004 - December 2007. The shaded cells denote the top five for each criterion. Weights are rebalanced on a monthly basis considering no short-selling constraints

|                | AV     | SD          | IR    | SR    | TO    | $AV_{20bp}^{net}$ | $AV_{50bp}^{net}$ |
|----------------|--------|-------------|-------|-------|-------|-------------------|-------------------|
| 1/N            | 12.732 | 12.755 (44) | 0.998 | 1.418 | -     | -                 | -                 |
| CCC            | 7.456  | 8.310 (13)  | 0.897 | 1.255 | 0.693 | 7.437             | 7.410             |
| CCC LS         | 4.815  | 8.248 (11)  | 0.584 | 0.806 | 0.538 | 4.801             | 4.779             |
| CCC NLS        | 6.327  | 8.105 (5)   | 0.781 | 1.080 | 0.588 | 6.311             | 6.287             |
| LS CCC         | 7.057  | 8.178 (8)   | 0.863 | 1.203 | 0.636 | 7.040             | 7.014             |
| NLS CCC        | 6.770  | 8.017 (2)   | 0.844 | 1.172 | 0.533 | 6.756             | 6.734             |
| LS CCC LS      | 4.145  | 8.501 (22)  | 0.488 | 0.672 | 0.500 | 4.132             | 4.112             |
| NLS CCC NLS    | 6.327  | 8.105 (5)   | 0.781 | 1.080 | 0.588 | 6.311             | 6.287             |
| DCC            | 7.898  | 8.319 (14)  | 0.950 | 1.328 | 0.710 | 7.879             | 7.851             |
| DCC LS         | 4.882  | 8.229 (9)   | 0.593 | 0.817 | 0.557 | 4.868             | 4.846             |
| DCC NLS        | 7.714  | 8.144 (7)   | 0.947 | 1.321 | 0.607 | 7.698             | 7.674             |
| LS DCC         | 7.885  | 8.322 (15)  | 0.948 | 1.325 | 0.712 | 7.866             | 7.838             |
| NLS DCC        | 7.807  | 8.270 (12)  | 0.944 | 1.326 | 0.725 | 7.788             | 7.760             |
| LS DCC LS      | 4.855  | 8.230 (10)  | 0.590 | 0.812 | 0.557 | 4.841             | 4.819             |
| NLS DCC NLS    | 7.532  | 8.092 (4)   | 0.931 | 1.302 | 0.617 | 7.516             | 7.491             |
| RM2006         | 11.344 | 8.814 (27)  | 1.287 | 1.856 | 0.342 | 11.334            | 11.318            |
| RM2006 LS      | 7.710  | 8.024 (3)   | 0.961 | 1.369 | 0.410 | 7.699             | 7.681             |
| RM2006 NLS     | 8.949  | 7.878 (1)   | 1.136 | 1.593 | 0.298 | 8.940             | 8.927             |
| RM1994         | 14.778 | 18.815 (47) | 0.786 | 1.137 | 2.155 | 14.726            | 14.647            |
| RM1994 LS      | 7.445  | 8.725 (26)  | 0.853 | 1.218 | 0.449 | 7.432             | 7.412             |
| RM1994 NLS     | 8.704  | 8.357 (16)  | 1.042 | 1.469 | 0.334 | 8.694             | 8.679             |
| DECO           | 2.809  | 9.805 (32)  | 0.287 | 0.401 | 0.351 | 2.800             | 2.786             |
| DECO NLS       | 2.679  | 9.970 (37)  | 0.269 | 0.376 | 0.431 | 2.668             | 2.651             |
| LS DECO        | 2.790  | 9.857 (34)  | 0.283 | 0.397 | 0.347 | 2.780             | 2.766             |
| NLS DECO       | 2.787  | 9.858 (35)  | 0.283 | 0.397 | 0.349 | 2.777             | 2.763             |
| NLS DECO NLS   | 2.581  | 10.013 (38) | 0.258 | 0.362 | 0.426 | 2.570             | 2.553             |
| OGARCH         | 11.656 | 8.429 (17)  | 1.383 | 1.988 | 0.298 | 11.648            | 11.636            |
| OGARCH LS      | 9.445  | 9.353 (29)  | 1.010 | 1.419 | 0.225 | 9.439             | 9.430             |
| OGARCH NLS     | 10.876 | 8.456 (20)  | 1.286 | 1.841 | 0.305 | 10.868            | 10.855            |
| LS OGARCH      | 10.483 | 8.509 (23)  | 1.232 | 1.758 | 0.296 | 10.475            | 10.463            |
| NLS OGARCH     | 11.656 | 8.429 (17)  | 1.383 | 1.988 | 0.298 | 11.648            | 11.636            |
| LS OGARCH LS   | 9.537  | 9.633 (30)  | 0.990 | 1.392 | 0.202 | 9.531             | 9.523             |
| NLS OGARCH NLS | 10.876 | 8.456 (20)  | 1.286 | 1.841 | 0.305 | 10.868            | 10.855            |
| GPVC           | 8.499  | 11.088 (42) | 0.767 | 1.089 | 1.042 | 8.446             | 8.366             |
| GPVC LS        | 9.312  | 8.604 (24)  | 1.082 | 1.525 | 0.218 | 9.306             | 9.296             |
| GPVC NLS       | 7.126  | 9.940 (36)  | 0.717 | 1.007 | 0.475 | 7.112             | 7.091             |
| LS GPVC        | 10.212 | 9.637 (31)  | 1.060 | 1.517 | 0.743 | 10.188            | 10.152            |
| NLS GPVC       | 7.733  | 10.320 (41) | 0.749 | 1.061 | 0.939 | 7.700             | 7.651             |
| LS GPVC LS     | 10.241 | 8.609 (25)  | 1.190 | 1.693 | 0.189 | 10.235            | 10.227            |
| NLS GPVC NLS   | 7.244  | 10.047 (39) | 0.721 | 1.015 | 0.464 | 7.230             | 7.209             |
| RPVC           | 2.919  | 14.295 (46) | 0.204 | 0.282 | 3.150 | 2.804             | 2.630             |
| RPCV LS        | 7.305  | 8.449 (19)  | 0.865 | 1.216 | 0.483 | 7.291             | 7.270             |
| RPVC NLS       | 6.695  | 10.147 (40) | 0.660 | 0.937 | 1.250 | 6.659             | 6.605             |
| LS RPVC        | 6.624  | 11.475 (43) | 0.577 | 0.771 | 1.751 | 6.568             | 6.483             |
| NLS RPVC       | 3.934  | 14.113 (45) | 0.279 | 0.375 | 2.174 | 3.877             | 3.791             |
| LS RPCV LS     | 6.994  | 9.090 (28)  | 0.769 | 1.062 | 0.460 | 6.979             | 6.956             |
| NLS RPVC NLS   | 6.838  | 9.806 (33)  | 0.697 | 0.984 | 0.985 | 6.810             | 6.769             |

Table 15: Annualised performance measures: AV, SD, IR, SR and TO stand for the average, standard deviation, information ratio, Sortino's ratio and turnover of the out-of-sample MVP returns.  $AV_{20bp}^{net}$  and  $AV_{50bp}^{net}$  stand for the average out-of-sample MVP return net of transaction costs considering 20 and 50 basis-points, respectively. Period January 2008 - June 2009. The shaded cells denote the top five for each criterion. Weights are rebalanced on a monthly basis considering no short-selling constraints

|                | AV      | SD          | IR     | SR     | TO    | $AV_{20bp}^{net}$ | $AV_{50bp}^{net}$ |
|----------------|---------|-------------|--------|--------|-------|-------------------|-------------------|
| 1/N            | -30.668 | 43.046 (46) | -0.713 | -0.960 | -     | -                 | -                 |
| CCC            | -19.417 | 19.608 (14) | -0.990 | -1.310 | 0.704 | -19.437           | -19.467           |
| CCC LS         | -19.353 | 19.584 (13) | -0.988 | -1.306 | 0.687 | -19.373           | -19.402           |
| CCC NLS        | -19.407 | 20.329 (22) | -0.955 | -1.267 | 0.488 | -19.422           | -19.444           |
| LS CCC         | -19.380 | 19.505 (10) | -0.994 | -1.313 | 0.658 | -19.398           | -19.426           |
| NLS CCC        | -19.602 | 19.582 (12) | -1.001 | -1.322 | 0.580 | -19.618           | -19.643           |
| LS CCC LS      | -19.290 | 19.505 (11) | -0.989 | -1.307 | 0.645 | -19.308           | -19.335           |
| NLS CCC NLS    | -19.407 | 20.329 (22) | -0.955 | -1.267 | 0.488 | -19.422           | -19.444           |
| DCC            | -15.559 | 19.673 (16) | -0.791 | -1.052 | 0.750 | -15.582           | -15.616           |
| DCC LS         | -15.812 | 19.672 (15) | -0.804 | -1.068 | 0.729 | -15.834           | -15.867           |
| DCC NLS        | -17.319 | 20.625 (27) | -0.840 | -1.119 | 0.503 | -17.335           | -17.359           |
| LS DCC         | -15.327 | 19.682 (18) | -0.779 | -1.037 | 0.754 | -15.350           | -15.384           |
| NLS DCC        | -13.128 | 19.361 (6)  | -0.678 | -0.910 | 0.754 | -13.150           | -13.184           |
| LS DCC LS      | -15.601 | 19.682 (17) | -0.793 | -1.054 | 0.735 | -15.624           | -15.657           |
| NLS DCC NLS    | -15.795 | 20.507 (25) | -0.770 | -1.030 | 0.507 | -15.811           | -15.836           |
| RM2006         | -12.434 | 22.419 (40) | -0.555 | -0.733 | 0.641 | -12.440           | -12.450           |
| RM2006 LS      | -7.281  | 20.495 (24) | -0.355 | -0.474 | 0.584 | -7.293            | -7.312            |
| RM2006 NLS     | -11.703 | 20.320 (21) | -0.576 | -0.781 | 0.300 | -11.709           | -11.719           |
| RM1994         | 15.202  | 46.693 (47) | 0.326  | 0.436  | 3.228 | 15.164            | 15.108            |
| RM1994 LS      | -5.687  | 21.025 (34) | -0.271 | -0.366 | 0.704 | -5.704            | -5.728            |
| RM1994 NLS     | -8.392  | 21.197 (36) | -0.396 | -0.545 | 0.360 | -8.401            | -8.415            |
| DECO           | -16.709 | 20.834 (31) | -0.802 | -1.069 | 0.423 | -16.719           | -16.733           |
| DECO NLS       | -16.353 | 21.212 (37) | -0.771 | -1.041 | 0.404 | -16.362           | -16.377           |
| LS DECO        | -15.192 | 20.757 (29) | -0.732 | -0.979 | 0.427 | -15.202           | -15.216           |
| NLS DECO       | -15.196 | 20.759 (30) | -0.732 | -0.980 | 0.427 | -15.206           | -15.221           |
| NLS DECO NLS   | -15.481 | 21.182 (35) | -0.731 | -0.989 | 0.408 | -15.490           | -15.505           |
| OGARCH         | -4.790  | 21.283 (39) | -0.225 | -0.307 | 0.727 | -4.807            | -4.833            |
| OGARCH LS      | -4.561  | 20.065 (19) | -0.227 | -0.307 | 0.635 | -4.576            | -4.599            |
| OGARCH NLS     | -12.047 | 19.405 (8)  | -0.621 | -0.822 | 0.390 | -12.056           | -12.070           |
| LS OGARCH      | -0.780  | 20.706 (28) | -0.038 | -0.051 | 0.674 | -0.795            | -0.819            |
| NLS OGARCH     | -4.790  | 21.283 (38) | -0.225 | -0.307 | 0.727 | -4.807            | -4.832            |
| LS OGARCH LS   | -2.276  | 20.191 (20) | -0.113 | -0.152 | 0.603 | -2.290            | -2.311            |
| NLS OGARCH NLS | -12.046 | 19.405 (7)  | -0.621 | -0.822 | 0.390 | -12.055           | -12.069           |
| GPVC           | -5.286  | 19.325 (5)  | -0.274 | -0.370 | 0.157 | -5.290            | -5.296            |
| GPVC LS        | -3.173  | 19.204 (4)  | -0.165 | -0.223 | 0.226 | -3.179            | -3.187            |
| GPVC NLS       | -8.691  | 18.815 (1)  | -0.462 | -0.617 | 0.134 | -8.695            | -8.700            |
| LS GPVC        | -2.206  | 19.423 (9)  | -0.114 | -0.155 | 0.142 | -2.210            | -2.215            |
| NLS GPVC       | -5.957  | 18.959 (3)  | -0.314 | -0.420 | 0.140 | -5.961            | -5.966            |
| LS GPVC LS     | -1.798  | 20.834 (32) | -0.086 | -0.116 | 0.184 | -1.800            | -1.804            |
| NLS GPVC NLS   | -8.761  | 18.841 (2)  | -0.465 | -0.621 | 0.134 | -8.765            | -8.770            |
| RPVC           | -27.965 | 26.268 (45) | -1.065 | -1.324 | 0.819 | -27.972           | -27.981           |
| RPCV LS        | -20.952 | 22.964 (42) | -0.912 | -1.158 | 0.647 | -20.959           | -20.970           |
| RPVC NLS       | -24.506 | 22.441 (41) | -1.092 | -1.407 | 0.490 | -24.513           | -24.522           |
| LS RPVC        | -31.971 | 25.057 (44) | -1.276 | -1.708 | 1.121 | -32.000           | -32.043           |
| NLS RPVC       | -12.300 | 20.894 (33) | -0.589 | -0.816 | 0.800 | -12.340           | -12.400           |
| LS RPCV LS     | -28.707 | 23.988 (43) | -1.197 | -1.616 | 0.848 | -28.728           | -28.759           |
| NLS RPVC NLS   | -14.866 | 20.620 (26) | -0.721 | -0.991 | 0.538 | -14.885           | -14.913           |

Table 16: Annualised performance measures: AV, SD, IR, SR and TO stand for the average, standard deviation, information ratio, Sortino's ratio and turnover of the out-of-sample MVP returns.  $AV_{20bp}^{net}$  and  $AV_{50bp}^{net}$  stand for the average out-of-sample MVP return net of transaction costs considering 20 and 50 basis-points, respectively. Period July 2009 - November 2017. The shaded cells denote the top five for each criterion. Weights are rebalanced on a monthly basis considering no short-selling constraints

|                | AV     | SD          | IR    | SR    | TO    | $AV_{20bp}^{net}$ | $AV_{50bp}^{net}$ |
|----------------|--------|-------------|-------|-------|-------|-------------------|-------------------|
| 1/N            | 13.130 | 16.057 (45) | 0.818 | 1.148 | -     | -                 | -                 |
| CCC            | 12.690 | 10.654 (26) | 1.191 | 1.737 | 1.004 | 12.663            | 12.621            |
| CCC LS         | 11.486 | 10.220 (16) | 1.124 | 1.659 | 0.732 | 11.467            | 11.438            |
| CCC NLS        | 13.022 | 10.245 (18) | 1.271 | 1.864 | 0.791 | 13.000            | 12.968            |
| LS CCC         | 12.882 | 10.461 (25) | 1.231 | 1.799 | 0.902 | 12.857            | 12.820            |
| NLS CCC        | 12.816 | 10.234 (17) | 1.252 | 1.833 | 0.778 | 12.795            | 12.763            |
| LS CCC LS      | 11.425 | 10.203 (15) | 1.120 | 1.652 | 0.669 | 11.408            | 11.382            |
| NLS CCC NLS    | 13.022 | 10.245 (18) | 1.271 | 1.864 | 0.791 | 13.000            | 12.968            |
| DCC            | 12.668 | 10.356 (21) | 1.223 | 1.784 | 1.034 | 12.639            | 12.597            |
| DCC LS         | 11.818 | 9.981 (8)   | 1.184 | 1.740 | 0.812 | 11.796            | 11.763            |
| DCC NLS        | 13.371 | 9.863 (4)   | 1.356 | 1.985 | 0.736 | 13.351            | 13.321            |
| LS DCC         | 12.645 | 10.360 (22) | 1.221 | 1.780 | 1.038 | 12.616            | 12.573            |
| NLS DCC        | 12.378 | 10.382 (23) | 1.192 | 1.735 | 1.044 | 12.350            | 12.306            |
| LS DCC LS      | 11.824 | 9.980 (7)   | 1.185 | 1.741 | 0.814 | 11.802            | 11.769            |
| NLS DCC NLS    | 13.221 | 9.861 (3)   | 1.341 | 1.960 | 0.734 | 13.201            | 13.171            |
| RM2006         | 12.330 | 11.295 (30) | 1.092 | 1.575 | 0.726 | 12.311            | 12.284            |
| RM2006 LS      | 15.062 | 10.132 (14) | 1.487 | 2.194 | 0.690 | 15.044            | 15.018            |
| RM2006 NLS     | 13.304 | 9.311 (1)   | 1.429 | 2.079 | 0.394 | 13.293            | 13.277            |
| RM1994         | 12.933 | 25.810 (47) | 0.501 | 0.713 | 3.385 | 12.863            | 12.759            |
| RM1994 LS      | 15.368 | 10.450 (24) | 1.471 | 2.136 | 0.696 | 15.349            | 15.322            |
| RM1994 NLS     | 14.368 | 9.662 (2)   | 1.487 | 2.153 | 0.396 | 14.357            | 14.341            |
| DECO           | 10.353 | 11.818 (31) | 0.876 | 1.263 | 0.398 | 10.343            | 10.327            |
| DECO NLS       | 9.927  | 12.165 (34) | 0.816 | 1.177 | 0.484 | 9.915             | 9.896             |
| LS DECO        | 10.441 | 11.820 (32) | 0.883 | 1.274 | 0.401 | 10.430            | 10.415            |
| NLS DECO       | 10.440 | 11.820 (32) | 0.883 | 1.274 | 0.401 | 10.430            | 10.415            |
| NLS DECO NLS   | 10.000 | 12.166 (35) | 0.822 | 1.186 | 0.489 | 9.988             | 9.969             |
| OGARCH         | 11.340 | 9.992 (11)  | 1.135 | 1.643 | 0.398 | 11.329            | 11.313            |
| OGARCH LS      | 9.998  | 9.975 (6)   | 1.002 | 1.462 | 0.344 | 9.989             | 9.976             |
| OGARCH NLS     | 11.993 | 10.047 (13) | 1.194 | 1.736 | 0.417 | 11.983            | 11.968            |
| LS OGARCH      | 11.324 | 9.909 (5)   | 1.143 | 1.661 | 0.407 | 11.313            | 11.297            |
| NLS OGARCH     | 11.345 | 9.991 (10)  | 1.136 | 1.644 | 0.398 | 11.335            | 11.319            |
| LS OGARCH LS   | 9.934  | 9.989 (9)   | 0.995 | 1.449 | 0.321 | 9.926             | 9.914             |
| NLS OGARCH NLS | 12.005 | 10.047 (12) | 1.195 | 1.738 | 0.417 | 11.994            | 11.979            |
| GPVC           | 12.427 | 14.417 (44) | 0.862 | 1.235 | 1.367 | 12.386            | 12.325            |
| GPVC LS        | 10.865 | 10.664 (27) | 1.019 | 1.473 | 0.363 | 10.856            | 10.842            |
| GPVC NLS       | 11.725 | 12.853 (38) | 0.912 | 1.303 | 0.742 | 11.707            | 11.679            |
| LS GPVC        | 11.626 | 13.094 (40) | 0.888 | 1.272 | 1.065 | 11.593            | 11.545            |
| NLS GPVC       | 12.270 | 13.950 (42) | 0.880 | 1.267 | 1.000 | 12.240            | 12.196            |
| LS GPVC LS     | 10.531 | 10.275 (20) | 1.025 | 1.489 | 0.298 | 10.523            | 10.511            |
| NLS GPVC NLS   | 11.923 | 13.054 (39) | 0.913 | 1.305 | 0.753 | 11.904            | 11.876            |
| RPVC           | 14.672 | 16.065 (46) | 0.913 | 1.357 | 2.231 | 14.609            | 14.514            |
| RPCV LS        | 10.363 | 10.724 (28) | 0.966 | 1.392 | 0.677 | 10.346            | 10.320            |
| RPVC NLS       | 12.290 | 13.300 (41) | 0.924 | 1.313 | 1.206 | 12.261            | 12.218            |
| LS RPVC        | 12.503 | 12.702 (36) | 0.984 | 1.411 | 1.598 | 12.451            | 12.374            |
| NLS RPVC       | 14.193 | 14.288 (43) | 0.993 | 1.423 | 2.256 | 14.177            | 14.153            |
| LS RPCV LS     | 10.655 | 10.881 (29) | 0.979 | 1.411 | 0.600 | 10.637            | 10.610            |
| NLS RPVC NLS   | 13.916 | 12.760 (37) | 1.091 | 1.559 | 1.040 | 13.891            | 13.854            |
